# Supplementary material for: Fabrication of hierarchically porous ZIF-8 using a competitive ligand via a one-step method in supercritical CO2 and its application for CO2 adsorption
Source: Royal Society of Chemistry journal article supplement (doi:10.1039/d3ce01097j), 2023-12-01
Supplement: d3ce01097j1.pdf [file d3ce01097j1.pdf]

# Fabrication of hierarchically porous ZIF-8 using competitive ligand via one-step method in supercritical fluid and its application in CO<sub>2</sub> adsorption

*Zhen Li <sup>a</sup>, Bo He <sup>a</sup>, Shaokun Tang <sup>\*a</sup>*

<sup>a</sup> Key Laboratory for Green Chemical Technology of Ministry of Education, School of Chemical Engineering & Technology, Tianjin University, Tianjin 300354, China

\* Corresponding author

Email: [shktang@tju.edu.cn](mailto:shktang@tju.edu.cn)

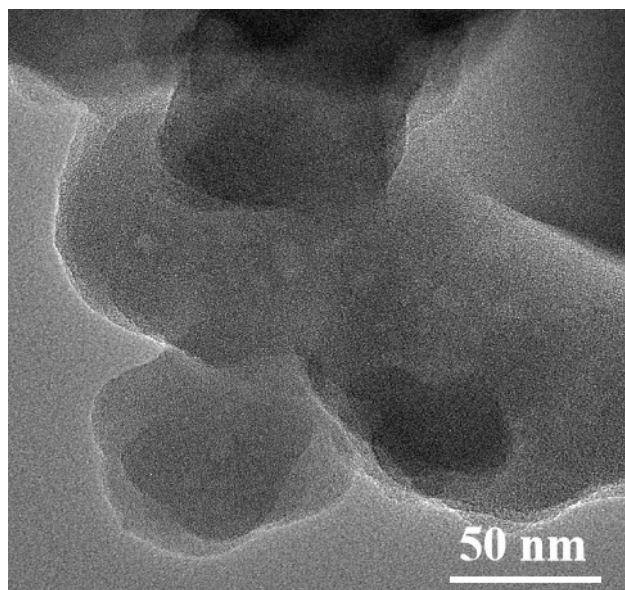

**Fig. S1** TEM images of Z-2.

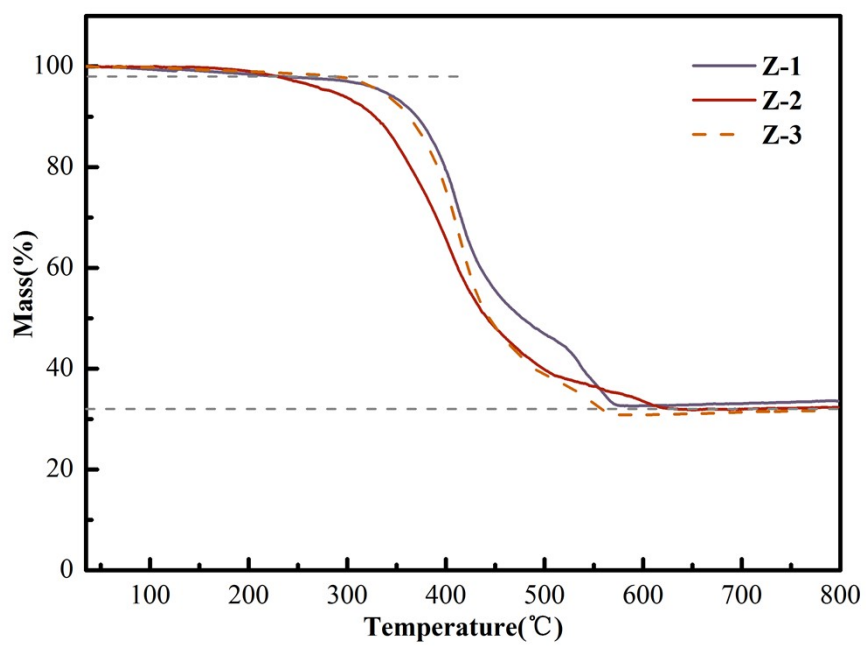

**Fig. S2** Thermogravimetric analyses (TGA) of samples.

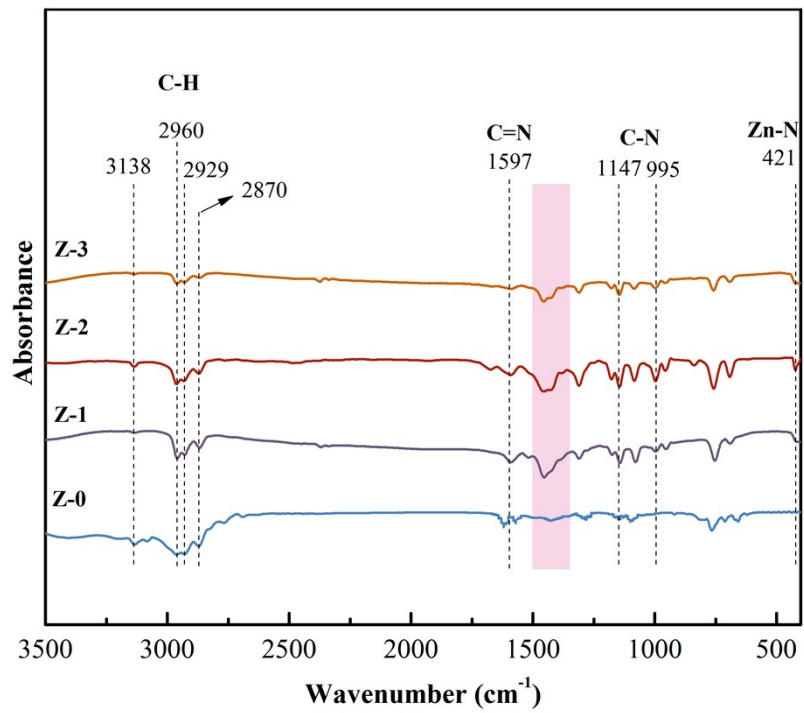

**Fig. S3** FT-IR spectra of ZIF-8 samples.

**Table S1.** Porosity properties of ZIF-8 synthesized at different temperatures<sup>a</sup>.

| <b>Samples</b> | $S_{BET}^b$<br>( $m^2/g$ ) | $S_{micro}^c$<br>( $m^2/g$ ) | $V_t^d$<br>( $cm^3/g$ ) | $V_{micro}^e$<br>( $cm^3/g$ ) | $D_{micro}^f$<br>( $nm$ ) | $V_{meso}^g$<br>( $cm^3/g$ ) | $D_{meso}^h$<br>( $nm$ ) | <b>Yield</b><br>(%) |
|----------------|----------------------------|------------------------------|-------------------------|-------------------------------|---------------------------|------------------------------|--------------------------|---------------------|
| Z-2-T (30)     | 849                        | 1167                         | 0.41                    | 0.33                          | 0.7                       | -                            | -                        | 76.1                |
| Z-2-T (50)     | 529                        | 338                          | 0.72                    | 0.08                          | 1.7                       | 1.21                         | 3.9~30                   | 77.0                |
| Z-2-T (70)     | 586                        | 470                          | 0.32                    | 0.21                          | 1.0                       | 0.24                         | -                        | 77.8                |

<sup>a</sup> The molar ration of zinc acetylacetonate, 2-methylimidazole and 2-butyl-1H-imidazole is 1:1:6.

Reaction pressure is 30 MPa. Reaction time is 3 hours.

<sup>b</sup> The BET-specific surface area.

<sup>c</sup> The t-plot-specific micropore surface area calculated from the  $N_2$  adsorption-desorption isotherm from  $S_{BET}$ .

<sup>d</sup> The total specific pore volume.

<sup>e</sup> T-Plot micropore volume.

<sup>f</sup> Estimated from the local maximum of NLDFT pore size distribution obtained in the desorption branch of  $N_2$  isotherm.

<sup>g</sup> The specific mesopore volume obtained from the BJH cumulative specific adsorption volume.

<sup>h</sup> Estimated from the local maximum of BJH pore size distribution obtained in the desorption branch of  $N_2$  isotherm.

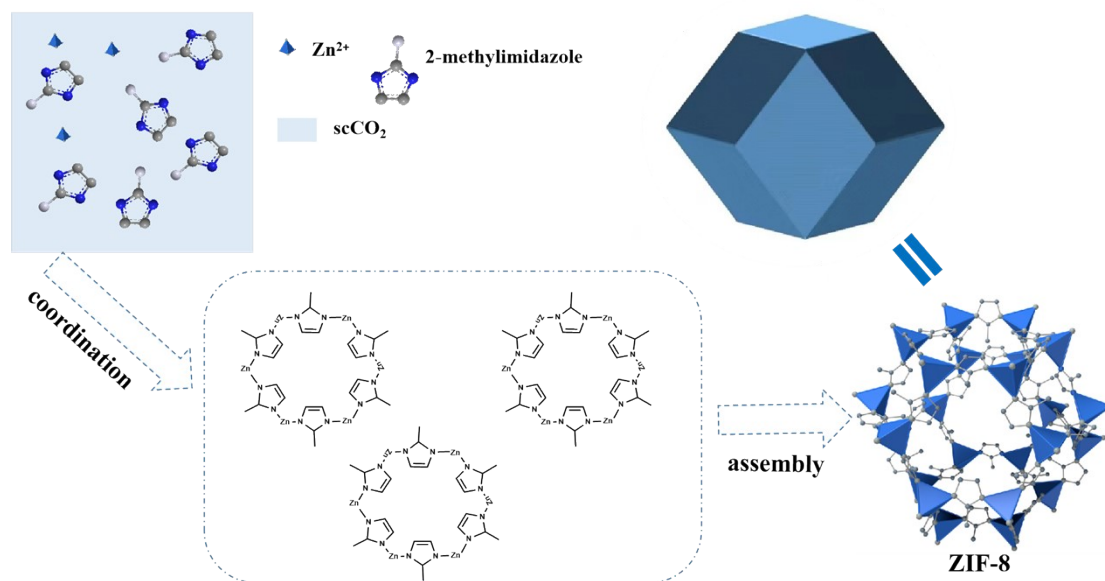

**Scheme S1.** Formation mechanism of ZIF-8 in  $scCO_2$ .

**Table S2.**  $CO_2$  equilibrium adsorption capacity of ZIF-8 synthesized in  $scCO_2$ .

| Samples    | Molar ratio of $Zn(acac)_2$ to 2-methylimidazole and 2-Butyl-1H-imidazole | Temperature / $^{\circ}C$ | Pressure/ MPa | Time/h | $CO_2$ equilibrium adsorption capacity (mmol/g sorbent) |
|------------|---------------------------------------------------------------------------|---------------------------|---------------|--------|---------------------------------------------------------|
| Z-1        | 1:1:1                                                                     | 50                        | 30            | 3      | 1.19                                                    |
| Z-2        | 1:1:6                                                                     | 50                        | 30            | 3      | 1.49                                                    |
| Z-3        | 1:1:12                                                                    | 50                        | 30            | 3      | 1.22                                                    |
| Z-0        | 1:2:0                                                                     | 50                        | 30            | 3      | 1.13                                                    |
| Z-2-T (30) | 1:1:6                                                                     | 30                        | 30            | 3      | 1.29                                                    |
| Z-2-T (70) | 1:1:6                                                                     | 70                        | 30            | 3      | 1.31                                                    |

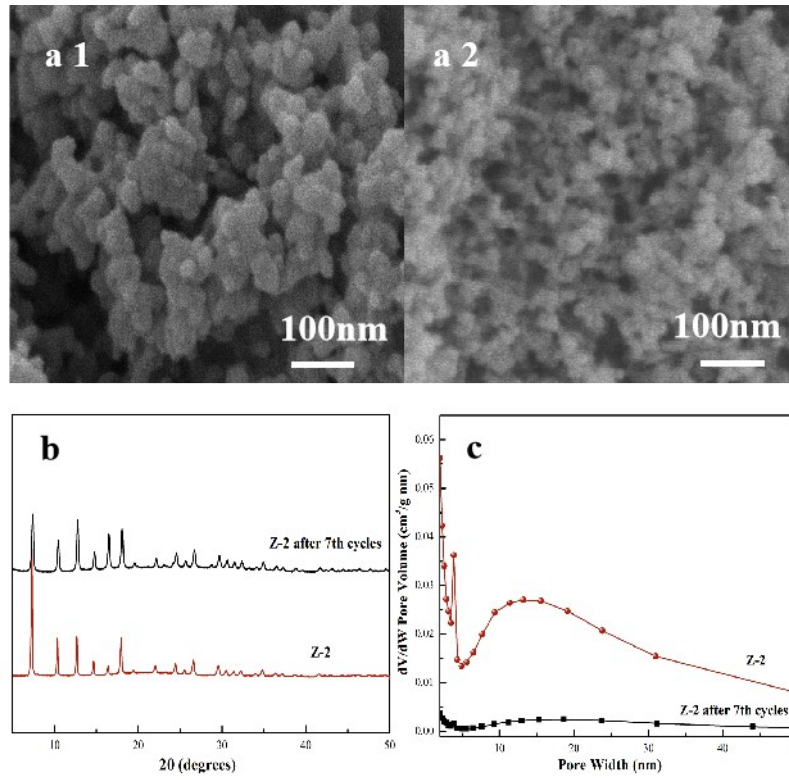

**Fig. S4** SEM images of Z-2 before (a1) and after (a2) seven cycles; (b) XRD patterns; (c) pore size distributions
